## CORRECTIONS

The rational design of suicide substrates of amine oxidases

By M. G. PALFREYMAN, I. A. McDONALD,  
P. BEY, C. DANZIN, M. ZREIKA, G. A. LYLES  
and J. R. FOZARD

Volume 14 (1986)

p. 412, left-hand column, the first two sentences of the paragraph beginning on line 40 should read: Initial experiments confirmed that the fluoroallylamine, MDL 72145, was a time-dependent irreversible inhibitor of rat aorta SSAO showing marked activity at a concentration of the order of 10 nM (Lyles & Fitzpatrick, 1985). However, as indicated above, MDL 72145 is also a potent and selective inhibitor of MAO-B.

A combined transient electric birefringence and excluded volume approach to macromolecular shape determination in solution

By S. E. HARDING

Volume 14 (1986)

p. 857, Fig. 1: the labelling has been printed incorrectly; the correct Figure appears below

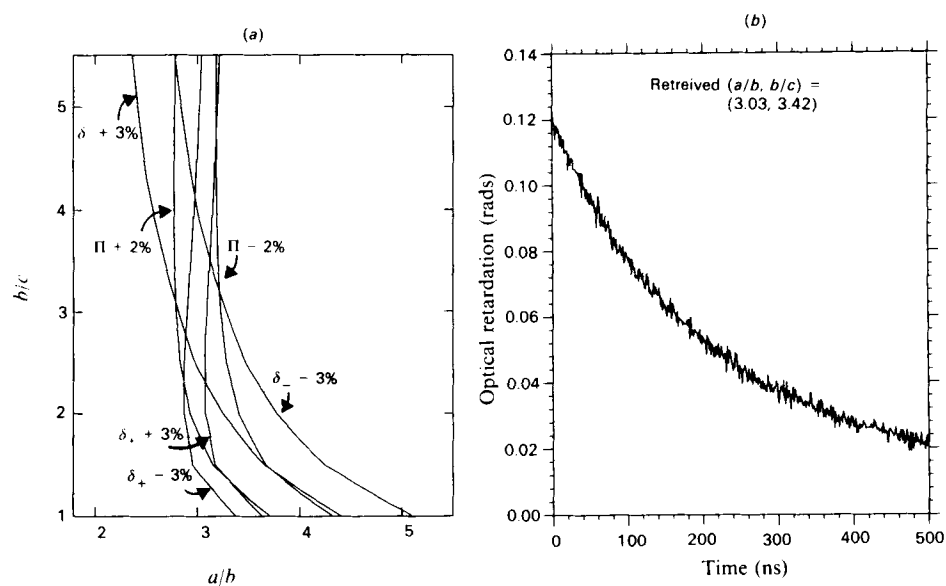

Fig. 1. Contour plots and decay curve

(a) Plots of contours of constant value of the shape functions  $\delta_+$  and  $\Pi$  in the  $(a/b, b/c)$  plane for a macromolecule with true  $(a/b, b/c) = (3.0, 3.0)$ , allowing for experimental error. (b) Simulated decay curve for a protein of true  $(a/b, b/c) = (3.0, 3.0)$ ,  $M_r$  240 000, partial specific volume 0.730 ml/g and (volume) swelling ratio 1.3. True  $A_+ = 0.07$ ;  $A_- = 0.05$ . Cut off time, 500 ns; 500 data points with 0.1 deg random S.E. A similar decay curve (100 ns cut off, 100 data points) for a protein of  $M_r$  170 000 and true  $(a/b, b/c) = (2.0, 2.0)$  gave a retrieved  $(a/b, b/c) = (2.02, 1.92)$ .
